# Supplementary material for: Identification and Characterization of Cells with Cancer Stem Cell Properties in Human Primary Lung Cancer Cell Lines
Source: PLOS journal article supplement (doi:10.1371/journal.pone.0057020), 2013-03-04
Supplement: S8 (10.1371/journal.pone.0057020.s008) [file journal.pone.0057020.s008]

**Table S1.** **DNA fingerprinting data on PLCCLs.**

| **PLCCL** | **Amelogenin** | **CSF1PO** | **D13S317** | **D16S539** | **D18S51** | **D21S11** | **D3S1359** | **D5S818** | **D7S820** | **D8S1179** | **FGA** | **Penta D** | **Penta E** | **TH01** | **TPOX** | **vWA** |
| --- | --- | --- | --- | --- | --- | --- | --- | --- | --- | --- | --- | --- | --- | --- | --- | --- |
| **LC004** | **x** | **12** | **10, 12** | **11** | **13, 14** | **29, 30** | **15, 17** | **10** | **10** | **11, 12** | **21,25** | **8, 10** | **11,12** | **7, 10** | **9, 10** | **16, 17** |
| **LC007** | **x** | **12** | **9, 13** | **8** | **11, 17** | **31.2,32.2** | **15, 16** | **9, 13** | **9, 12** | **14, 15** | **21,24** | **10,12** | **6, 12** | **8, 10** | **8, 11** | **13, 14, 18, 19** |
| **LC006** | **x, y** | **12** | **10, 11** | **9, 11** | **18** | **30, 33.2** | **14, 18** | **11, 12** | **8, 10** | **12, 13** | **21.2, 23.2** | **10,11** | **9, 12** | **7** | **9, 11** | **14, 15** |
| **LC021** | **x,y** | **11, 12** | **11, 12** | **12** | **13, 15** | **29, 33.2** | **15, 17** | **10, 12** | **11, 12** | **13, 16** | **21** | **8, 12** | **10,11** | **7** | **8, 12** | **16, 17, 18** |
| **LC021X1** | **x,y** | **11, 12** | **11, 12** | **12** | **13, 15** | **29, 33.2** | **15, 17** | **10, 12** | **11, 12** | **13, 16** | **18,21** | **8, 12** | **10,11** | **7** | **8, 12** | **16, 17, 18** |
