# Supplementary material for: Identification and Characterization of Cells with Cancer Stem Cell Properties in Human Primary Lung Cancer Cell Lines
Source: PLOS journal article supplement (doi:10.1371/journal.pone.0057020), 2013-03-04
Supplement: S11 (10.1371/journal.pone.0057020.s011) [file journal.pone.0057020.s011]

**Table S4. Single cell 2D colony forming and heterogeneity assay**

| **Cell population** | **PLCCL** | **Holoclone**  **(No./96-well plate)** | **Meroclone**  **(No./96-well plate)** | **Paraclone**  **(No./96-well plate)** |
| --- | --- | --- | --- | --- |
| **CD44high** | **LC004** | **1.67** | **3,00** | **7.33** |
|  | **LC006** | **2,67** | **20,33** | |
| **CD44low/-** | **LC004** | **0,00** | **0,00** | **2,00** |
|  | **LC006** | **0,00** | **3.33** | |

*** The values represent the average values of three individual analyses.**
